# Supplementary material
Source: HighWire-hosted journal article supplement (https://www.rcpjournals.org/highwire/filestream/13058/field_highwire_adjunct_files/1/Han_Supplementary_material_S2.pdf)
Supplement: Han_Supplementary_material_S2.pdf [file Han_Supplementary_material_S2.pdf]

**Supplementary Table S2.** Risk of death within 30 days and six months of hospital discharge comparing patients who were not readmitted, readmitted once or 2 times of different or the same condition.

|                                  | Logistic regression |            |          |                          |            |          |
|----------------------------------|---------------------|------------|----------|--------------------------|------------|----------|
|                                  | Unadjusted          |            |          | Adjusted for age and sex |            |          |
| <b>Died within 30 days</b>       | OR                  | 95% CI     | <i>p</i> | OR                       | 95% CI     | <i>p</i> |
| No readmission (reference group) | 1                   | --         | --       | 1                        | --         | --       |
| 1 non-identical AR episode       | 5.40                | 4.57-6.39  | <0.001   | 3.66                     | 3.08-4.34  | <0.001   |
| ≥2 non-identical AR episodes     | 6.00                | 4.74-7.60  | <0.001   | 3.48                     | 2.73-4.43  | <0.001   |
| 1 identical AR episode           | 12.19               | 8.29-17.93 | <0.001   | 11.59                    | 7.67-17.51 | <0.001   |
| ≥2 identical AR episodes         | 1095                | 6.47-18.53 | <0.001   | 6.93                     | 4.02-11.94 | <0.001   |
| <b>Died within 6 months</b>      | OR                  | 95% CI     | <i>p</i> | OR                       | 95% CI     | <i>p</i> |
| No readmission (reference group) | 1                   | --         | --       | 1                        | --         | --       |
| 1 non-identical AR episode       | 4.65                | 4.15-5.21  | <0.001   | 3.24                     | 2.88-3.66  | <0.001   |
| ≥2 non-identical AR episodes     | 6.97                | 5.97-8.14  | <0.001   | 4.20                     | 3.57-4.94  | <0.001   |
| 1 identical AR episode           | 7.03                | 5.07-7.76  | <0.001   | 7.19                     | 5.60-10.34 | <0.001   |
| ≥2 identical AR episodes         | 12.23               | 8.25-18.13 | <0.001   | 8.59                     | 8.59-13.16 | <0.001   |

AR = admission-readmission
